# Supplementary material
Source: publisher figshare collection journal article supplement (https://asha.figshare.com/articles/dataset/_/12291029)
Supplement: Supplementary file 2 [file 1]

**Supplemental Material S1.** Sample clinical observation and data sheet: Day 6.

**Informal Narrative Analysis**

**Pre-intervention.**

*Clients were given a pictured scene in which airplane passengers, luggage, and balls of various colors are floating throughout the cabin due to zero gravity and were prompted to write a story about it.*

One day wen steve, Bob an Fred wher on a plan evything went to low gravaty fred wen to dunk for the frst time (hes short) while evybody was having fun sumone threw alot of balls wich made it more fun but than bob choks on one and nobody can do the himlick becaus ther in space. so bob dies.

*Spontaneous spelling errors underlined= 16*

**Syntax.**

|   | Sentence                                                                              | Complexity |         | Grammaticality |            |
|---|---------------------------------------------------------------------------------------|------------|---------|----------------|------------|
|   |                                                                                       | Simple     | Complex | Complete       | Incomplete |
| 1 | One day when Steve, Bob, and Fred were on a plane, everything went to low gravity.    |            | X       | X              |            |
| 2 | Fred went to dunk for the first time (he was short).                                  | X          |         | X              |            |
| 3 | While everybody was having fun, someone threw a lot of balls, which made it more fun. |            | X       | X              |            |
| 4 | But then Bob chokes on one, and nobody can do the Heimlich because they're in space.  |            | X       | X              |            |
| 5 | So Bob dies.                                                                          | X          |         | X              |            |

He produced a narrative 62 words in length containing 5 complete sentences (2 simple, 3 complex).

**Vocabulary.**

Some sophisticated vocabulary used: gravaty (gravity), himlick (Heimlich)

Number of words ≥ 3 syllables: 4/62

**Mechanics.**

Numerous capitalization and punctuation errors noted. Inconsistent capitalization of proper nouns and sentence-initial words. Use of terminal punctuation was also inconsistent, and no commas were used. The apostrophe in the contraction *he's* was omitted. He did indent the first sentence in the paragraph.

**Story Grammar Elements.** 4/7 story grammar elements were included.

|                                   |                                                   |
|-----------------------------------|---------------------------------------------------|
| Setting/characters/time           | On a plane/ Steve, Fred, Bob/ one day             |
| Initiating event                  | Bob choked on a ball                              |
| Internal response                 | <i>absent</i>                                     |
| Plan                              | <i>absent</i>                                     |
| Attempt to resolve problem        | perform Heimlich maneuver                         |
| Consequence                       | Heimlich maneuver unsuccessful due to low gravity |
| Emotional reaction to consequence | <i>absent</i>                                     |

**Post-intervention.**

*Clients were given a pictured scene in which dinosaurs were running through a busy city street and were prompted to write a story about it.*

One day wen rex an Thomas wer taking over chicago Thomas accidently hit rex an rex went done. rex got mad and sed stop after Thomas bite his tal. rex slamd Thomas to the grownd. After he got his breth rex told Thomas to chill out. He gave Thomas a snikers becaus he was hangry. Thomas chilld out. they took over the town so they culd eat all the pizza.

*Spontaneous spelling errors underlined= 16*

**Syntax.**

|   | Sentence                                                                                                                                      | Complexity |         | Grammaticality |            |
|---|-----------------------------------------------------------------------------------------------------------------------------------------------|------------|---------|----------------|------------|
|   |                                                                                                                                               | Simple     | Complex | Complete       | Incomplete |
| 1 | One day wen (when) rex an (and) Thomas wer (were) taking over chicago Thomas accidently (accidentally) hit rex an (and) rex went done (down). |            | X       | X              |            |
| 2 | Rex got mad and sed (said) stop after Thomas bite (bit) his tal (tail).                                                                       |            | X       | X              |            |
| 3 | rex slamd (slammed) Thomas to the grownd (ground).                                                                                            | X          |         | X              |            |
| 4 | After he got his breth (breath) rex told Thomas to chill out.                                                                                 |            | X       | X              |            |
| 5 | He gave Thomas a snikers (Snickers) because (because) he was hangry.                                                                          |            | X       | X              |            |
| 6 | Thomas chilld out.                                                                                                                            | X          |         | X              |            |
| 7 | they took over the town so they culd (could) eat all the pizza.                                                                               |            | X       | X              |            |

He produced a narrative 70 words in length containing 7 complete sentences (2 simple, 5 complex).

**Vocabulary.**

Some sophisticated vocabulary used: accidently (accidentally). Number of words ≥ 3 syllables: 2/70.

**Mechanics.**

Numerous capitalization and punctuation errors noted. Inconsistent capitalization of proper nouns and sentence-initial words. Use of terminal punctuation was also inconsistent, and no commas were used. He did indent the first sentence in the paragraph.

**Story Grammar Elements.** 5/7 story grammar elements were included.

|                                   |                                                                                  |
|-----------------------------------|----------------------------------------------------------------------------------|
| Setting/characters/time           | Chicago/Rex and Thomas/one day                                                   |
| Initiating event                  | Thomas accidentally hit Rex                                                      |
| Internal response                 | Rex got mad                                                                      |
| Plan                              | <i>absent</i>                                                                    |
| Attempt to resolve problem        | Rex slammed Thomas to the ground, told him to chill out, and gave him a Snickers |
| Consequence                       | Thomas chilled out, they took over Chicago                                       |
| Emotional reaction to consequence | <i>absent</i>                                                                    |

## Spelling to Dictation

| Orthographic Target | Targeted Spelling Features    | Child’s Spelling | pre       | Child’s Spelling  | post            |           |
|---------------------|-------------------------------|------------------|-----------|-------------------|-----------------|-----------|
| tapped              | Double the consonant          | tapt             | X         | taped             | X               |           |
|                     | Past tense -ed pronounced /t/ |                  | X         |                   | ☐               |           |
| peeked              | Vowel combination             | pekt             | X         | peekt             | ☐               |           |
|                     | Past tense -ed pronounced /t/ |                  | X         |                   | X               |           |
| floated             | Vowel combination             | flooted          | X         | floated           | ☐               |           |
|                     | Past tense -ed pronounced /d/ |                  | ☐         |                   | ☐               |           |
| suited              | Vowel combination             | suted            | X         | sooted            | X               |           |
|                     | Past tense -ed pronounced /d/ |                  | ☐         |                   | ☐               |           |
| leaked              | Vowel combination             | lekt             | X         | leked             | X               |           |
|                     | Past tense -ed pronounced /t/ |                  | X         |                   | ☐               |           |
| soaked              | Vowel combination             | sokt             | X         | sooked            | X               |           |
|                     | Past tense -ed pronounced /t/ |                  | X         |                   | ☐               |           |
| soaped              | Vowel combination             | sopt             | X         | soaped            | ☐               |           |
|                     | Past tense -ed pronounced /t/ |                  | X         |                   | ☐               |           |
| begged              | Double the consonant          | begd             | X         | begged            | ☐               |           |
|                     | Past tense -ed pronounced /d/ |                  | X         |                   | ☐               |           |
| robbed              | Double the consonant          | robed            | X         | robed             | X               |           |
|                     | Past tense -ed pronounced /d/ |                  | ☐         |                   | ☐               |           |
| fanned              | Double the consonant          | faned            | X         | fanned            | ☐               |           |
|                     | Past tense -ed pronounced /d/ |                  | ☐         |                   | ☐               |           |
| hummed              | Double the consonant          | humd             | X         | humed             | x               |           |
|                     | Past tense -ed pronounced /d/ |                  | X         |                   | ☐               |           |
| sailed              | Vowel combination             | sald             | X         | sailed            | ☐               |           |
|                     | Past tense -ed pronounced /d/ |                  | X         |                   | ☐               |           |
| waited              | Vowel combination             | wated            | X         | waited            | ☐               |           |
|                     | Past tense -ed pronounced /d/ |                  | ☐         |                   | ☐               |           |
| weeded              | Vowel combination             | weded            | X         | weeded            | ☐               |           |
|                     | Past tense -ed pronounced /d/ |                  | ☐         |                   | ☐               |           |
| skidded             | Double the consonant          | skided           | X         | skided            | X               |           |
|                     | Past tense -ed pronounced /d/ |                  | ☐         |                   | ☐               |           |
| padded              | Double the consonant          | paded            | X         | padded            | ☐               |           |
|                     | Past tense -ed pronounced /d/ |                  | ☐         |                   | ☐               |           |
| ripped              | Double the consonant          | ript             | X         | riped             | X               |           |
|                     | Past tense -ed pronounced /t/ |                  | X         |                   | ☐               |           |
| boated              | Vowel combination             | boted            | X         | boated            | ☐               |           |
|                     | Past tense -ed pronounced /d/ |                  | ☐         |                   | ☐               |           |
| banned              | Double the consonant          | band             | X         | baned             | X               |           |
|                     | Past tense -ed pronounced /d/ |                  | X         |                   | ☐               |           |
| popped              | Double the consonant          | popt             | X         | popped            | ☐               |           |
|                     | Past tense -ed pronounced /t/ |                  | X         |                   | ☐               |           |
| Targeted Feature    | Pre-intervention              |                  |           | Post-intervention |                 |           |
|                     | # correct                     | # opportunities  | % correct | # correct         | # opportunities | % correct |
| Consonant           | 0                             | 10               | 0%        | 4                 | 10              | 40%       |

|                               |   |    |      |   |    |      |
|-------------------------------|---|----|------|---|----|------|
| doubling rule                 |   |    |      |   |    |      |
| Past tense ED pronounced /t/  | 0 | 7  | 0%   | 6 | 7  | 86%  |
| Past tense ED pronounced /d/  | 2 | 6  | 33%  | 6 | 6  | 100% |
| Past tense ED pronounced /ɪd/ | 7 | 7  | 100% | 7 | 7  | 100% |
| Vowel combinations            | 0 | 10 | 0%   | 7 | 10 | 70%  |

**Oral Reading Fluency**

| Total # of words read in 3-minute sample | # of reading miscues |    |   | Divide by 3 (minutes) |         | # of WCPM |
|------------------------------------------|----------------------|----|---|-----------------------|---------|-----------|
| 288                                      | -                    | 23 | = | 265                   | 265 ÷ 3 | = 88.3    |
